# Supplementary material for: Erbb4 Is Required for Cerebellar Development and Malignant Phenotype of Medulloblastoma
Source: MDPI journal article supplement (doi:10.3390/cancers12040997), 2020-04-17

wt CGNPs

|       |   |   |   |   |   |   |
|-------|---|---|---|---|---|---|
| hNRG1 | - | - | - | - | + | + |
| Hbegf | - | - | + | + | - | - |
| Shh   | - | + | - | + | - | + |

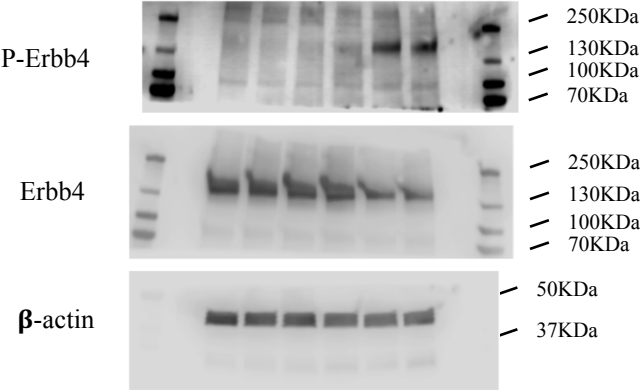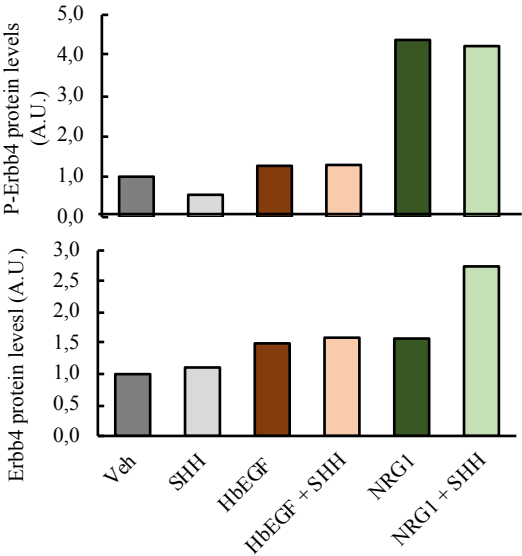

wt CGNPs

|       |   |   |   |   |   |   |   |   |
|-------|---|---|---|---|---|---|---|---|
| Shh   | - | - | - | - | + | + | + | + |
| hNRG1 | - | + | - | + | - | + | - | + |
| DEX   | - | - | + | + | - | - | + | + |

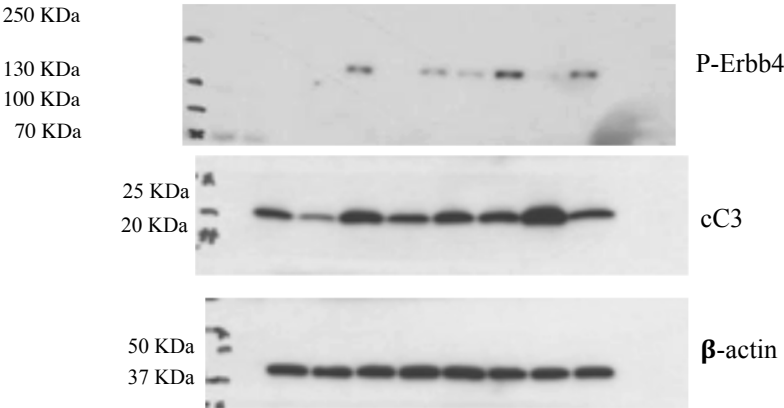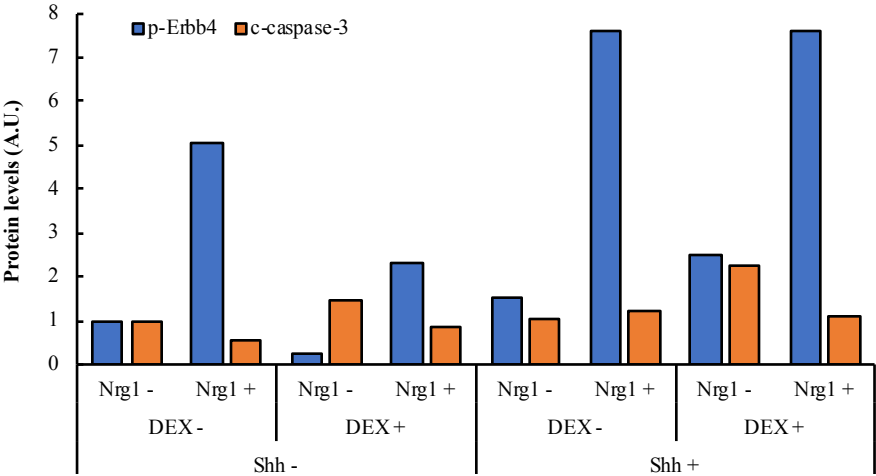

ERBB4 KO  
CGNPs

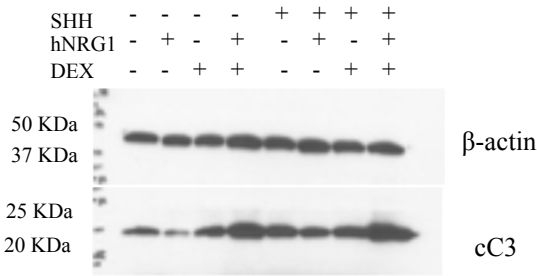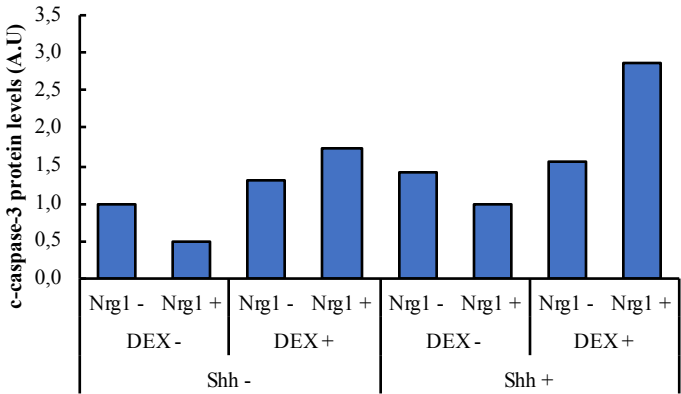

p15

ErbB4Het/KO + SmoM2 tumors

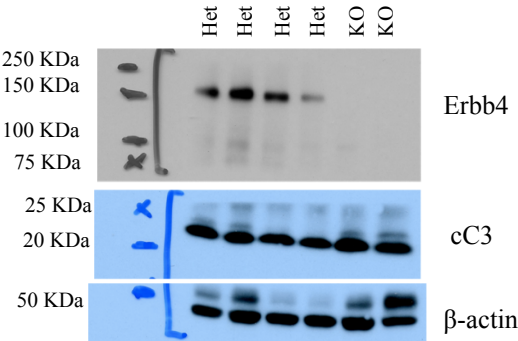

p17

ErbB4Het/KO + SmoM2 tumors

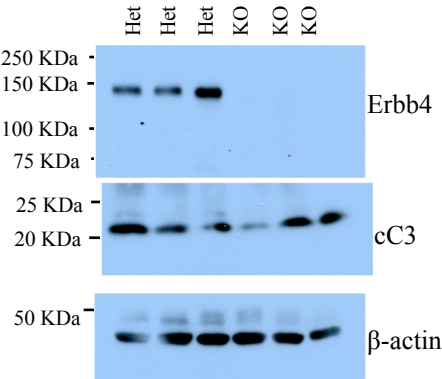

Supplement: s1 [file s1]
